# Supplementary material for: Endothelial differentiation of bone marrow mesenchyme stem cells applicable to hypoxia and increased migration through Akt and NFκB signals
Source: PubMed Central journal article supplement (PMC5296962; doi:10.1186/s13287-017-0470-0), 2017-02-07

**A**

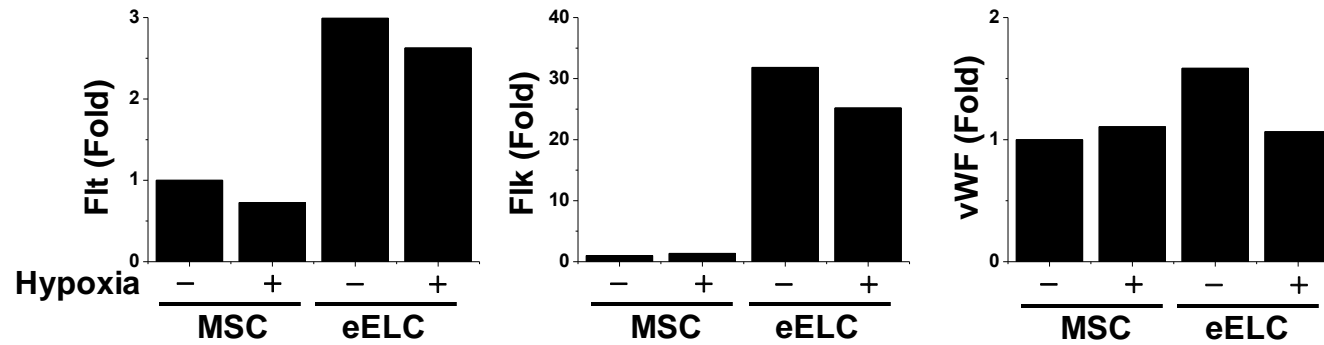

**B**

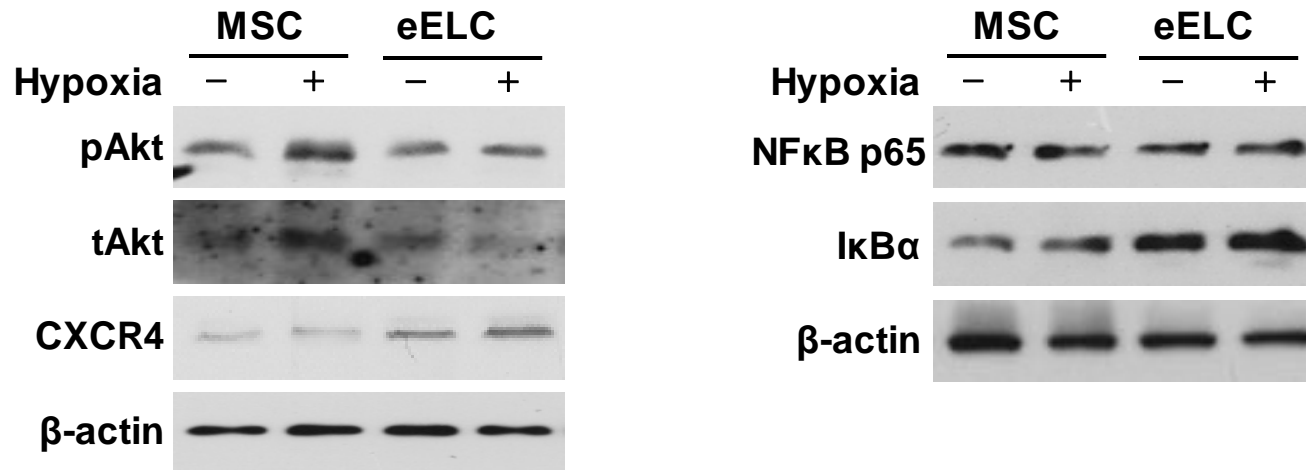

Supplement: 13287_2017_470_MOESM2_ESM.pdf [file 13287_2017_470_MOESM2_ESM.pdf]
